# Supplementary material for: The MOSAiC ice floe: sediment-laden survivor from the Siberian shelf
Source: Copernicus journal article supplement (doi:10.5194/tc-2020-64), 2020-02-25
Supplement: Supplementary file 1 [file tc-2020-64-supplement.pdf]

## Supplements for manuscript:

# The MOSAiC ice floe: sediment-laden survivor from the Siberian shelf

5 Thomas Krumpfen<sup>1</sup>, Florent Birrien<sup>1</sup>, Frank Kauker<sup>1</sup>, Thomas Rackow<sup>1</sup>, Luisa von Albedyll<sup>1</sup>, Michael Angelopoulos<sup>1</sup>, H. Jakob Belter<sup>1</sup>, Vladimir Bessonov<sup>2</sup>, Ellen Damm<sup>1</sup>, Klaus Dethloff<sup>1</sup>, Jari Haapala<sup>3</sup>, Christian Haas<sup>1</sup>, Stefan Hendricks<sup>1</sup>, Jens Hoemann<sup>1</sup>, Mario Hoppmann<sup>1</sup>, Lars Kaleschke<sup>1</sup>, Michael Karcher<sup>1</sup>, Nikolai Kolabutin<sup>2</sup>, Josefine Lenz<sup>1,4</sup>, Anne Morgenstern<sup>1</sup>, Marcel Nicolaus<sup>1</sup>, Uwe Nixdorf<sup>1</sup>, Tomash Petrovsky<sup>2</sup>, Benjamin Rabe<sup>1</sup>, Lasse Rabenstein<sup>5</sup>, Markus Rex<sup>1</sup>, Robert Ricker<sup>1</sup>, Jan Rohde<sup>1</sup>, Egor Shimanchuk<sup>2</sup>, Suman Singha<sup>6</sup>, Vasily Smolyanitsky<sup>2</sup>, Vladimir Sokolov<sup>2</sup>, Tim Stanton<sup>7</sup>, Anna Timofeeva<sup>2</sup>, Michel Tsamados<sup>8</sup>

15 <sup>1</sup>Alfred Wegener Institute, Helmholtz Centre for Polar and Marine Research, Am Handelshafen 12, 27570 Bremerhaven, Germany

<sup>2</sup>Arctic and Antarctic Research Institute, Ulitsa Beringa, 38, Saint Petersburg, 199397, Russia

<sup>3</sup>Finnish Meteorological Institute, Marine Research, P.O.Box 503, FI-00101 Helsinki, Finland

20 <sup>4</sup>Association of Polar Early Career Scientists, Alfred Wegener Institute for Polar and Marine Research, Telegrafenberg A45, 14473 Potsdam, Germany

<sup>5</sup>Drift & Noise Polar Services, Stavendam 17, 28195 Bremen, Germany

<sup>6</sup>German Aerospace Center, Remote Sensing Technology Institute, SAR Signal Processing, Am Fallturm 9, 28359 Bremen, Germany

<sup>7</sup>Naval Postgraduate School, Oceanography Department, 833 Dyer Road, Building 232, Monterey, CA 93943, US

25 <sup>8</sup>University College London, Dept. of Earth Science, 5 Gower Place, London WC1E 6BS, UK

Correspondence to: Thomas Krumpfen ([tkrumpfen@awi.de](mailto:tkrumpfen@awi.de))

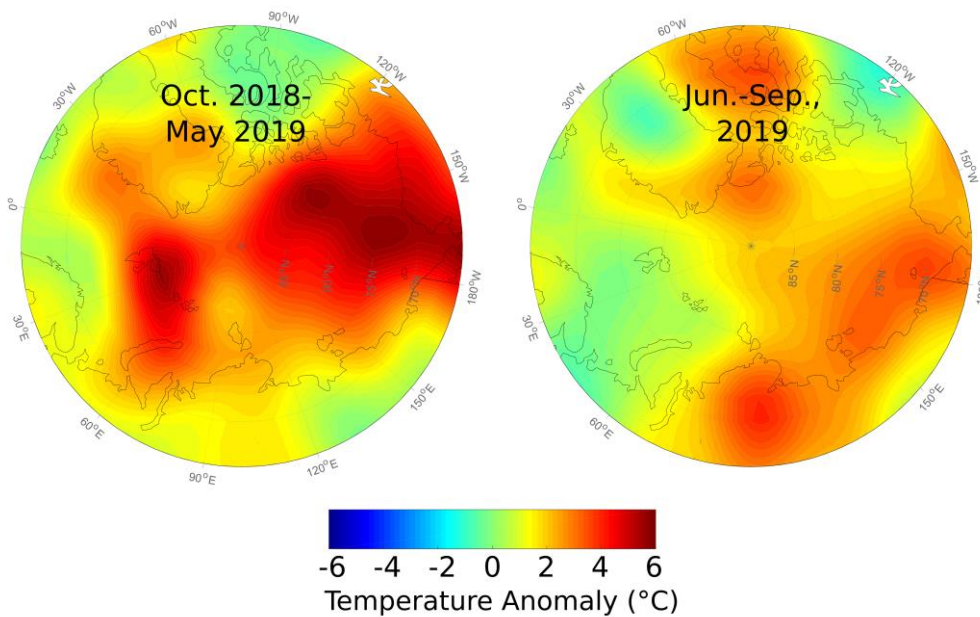

30

**Figure A, Supplement:** left) October 2018 – May 2019 and right) June – September 2019 1000 hPa air temperature anomalies in °C in comparison to the 1981 - 2010 climatology (data source: [www.esrl.noaa.gov/psd/products](http://www.esrl.noaa.gov/psd/products)).

35

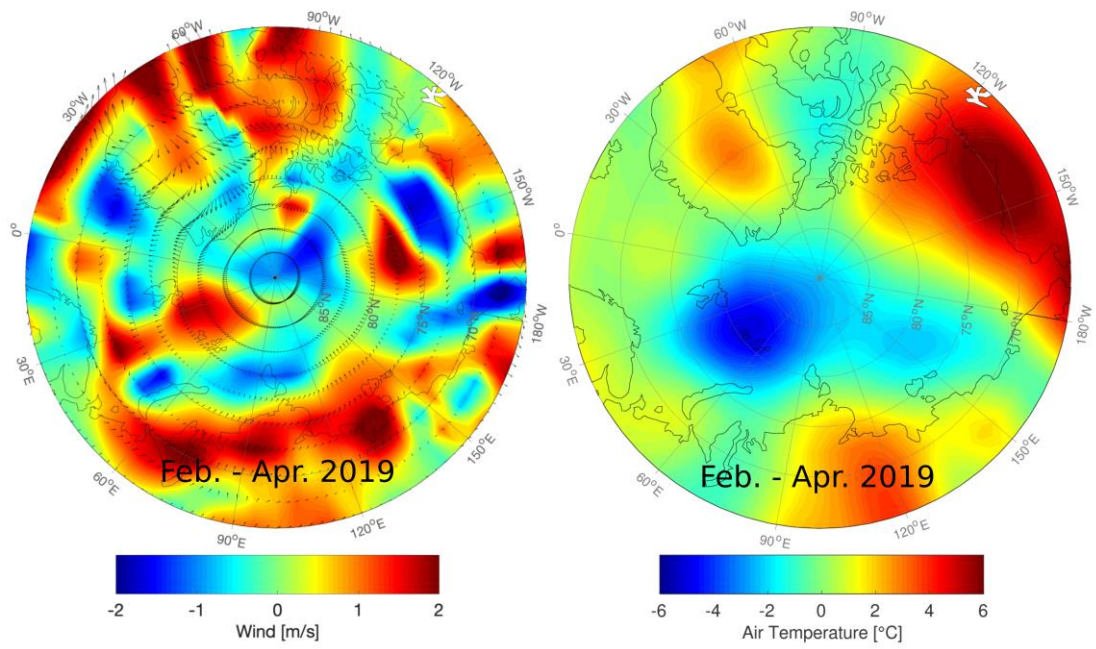

**Figure B, Supplement:** left) February – April 2019 wind velocity anomalies at 10 m height and right) February - April 2019 1000 hPa air temperature anomalies in comparison to the 2011 - 2018 (CryoSat-2 period) climatology (data source: [www.esrl.noaa.gov/psd/products](http://www.esrl.noaa.gov/psd/products)).
